# Supplementary material for: QbD-Optimized, Phospholipid-Based Elastic Nanovesicles for the Effective Delivery of 6-Gingerol: A Promising Topical Option for Pain-Related Disorders
Source: MDPI journal article supplement (doi:10.3390/ijms24129983), 2023-06-10
Supplement: s1 [file s1]

## Supplementary Figure S1

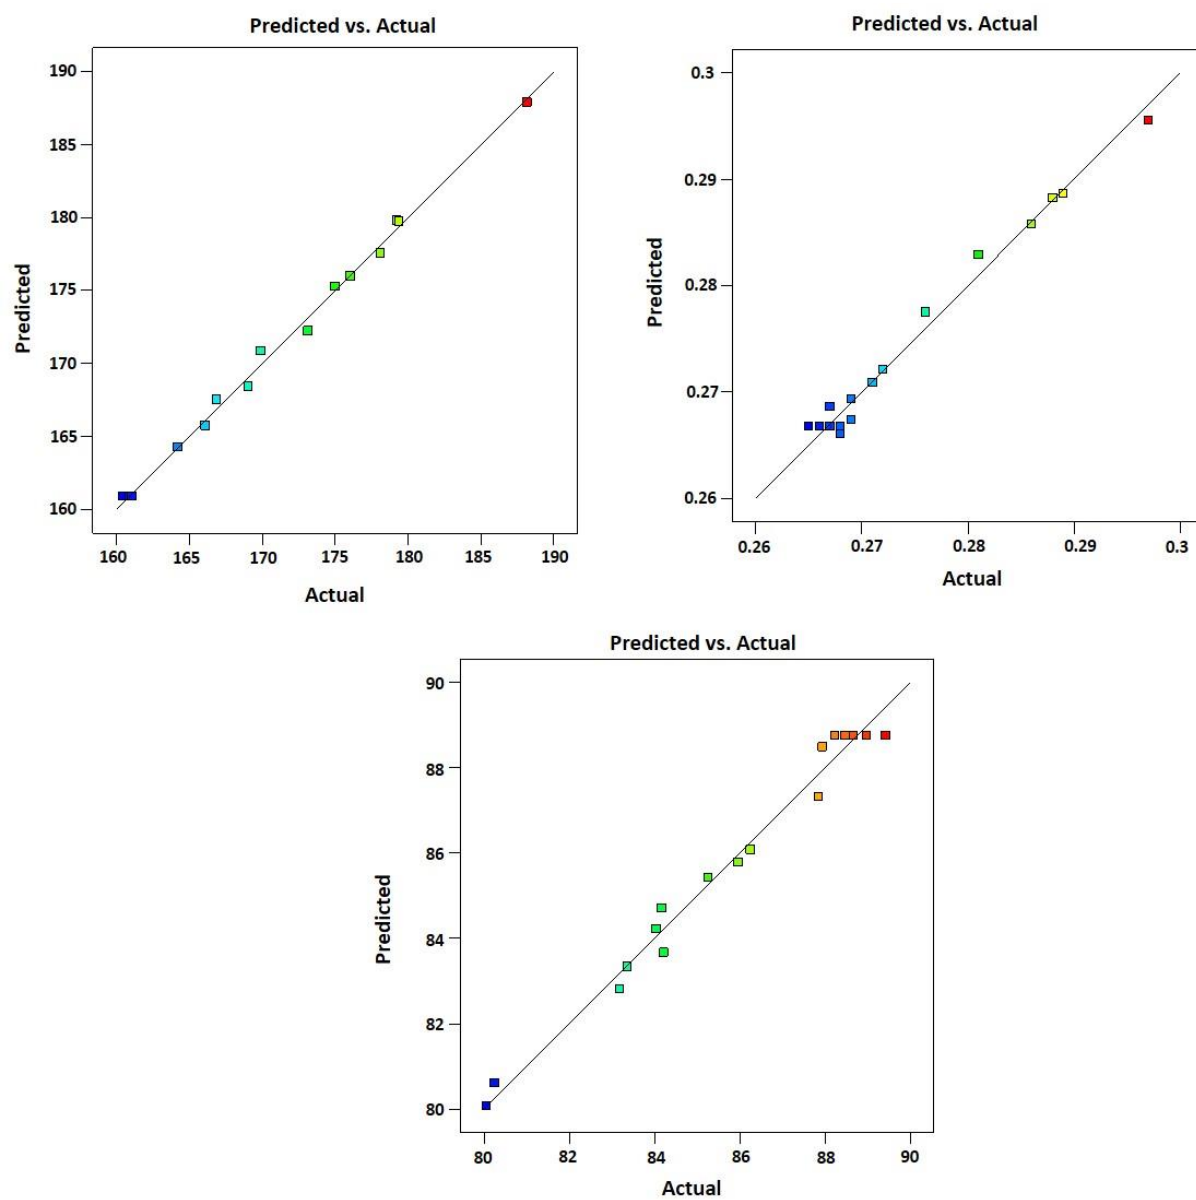

**Figure S1.** The predicted vs Actual plot for various responses

## Supplementary Figure S2

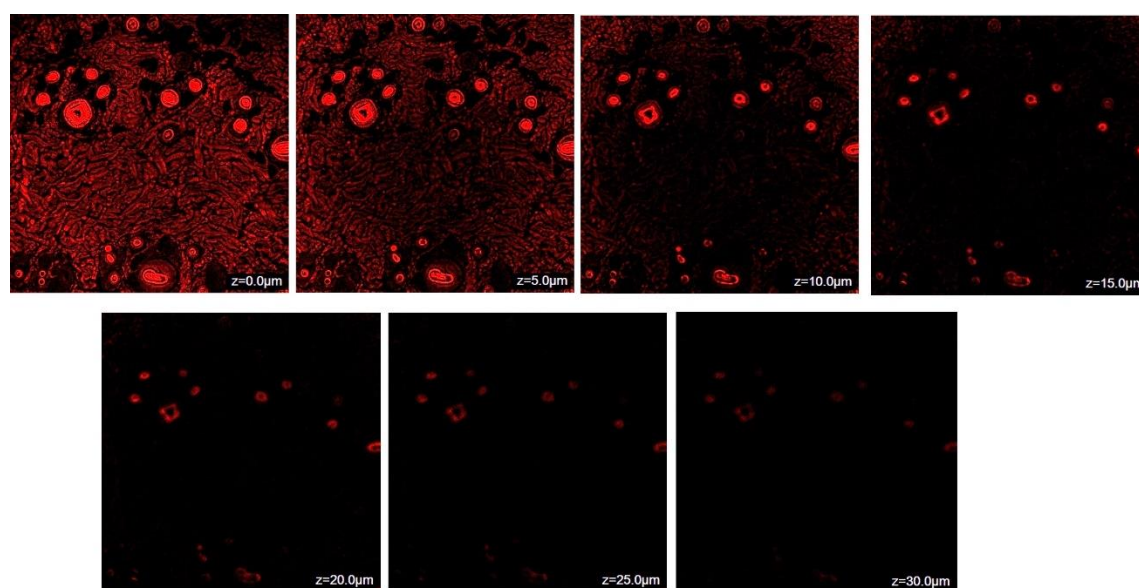

**A. Formulation**

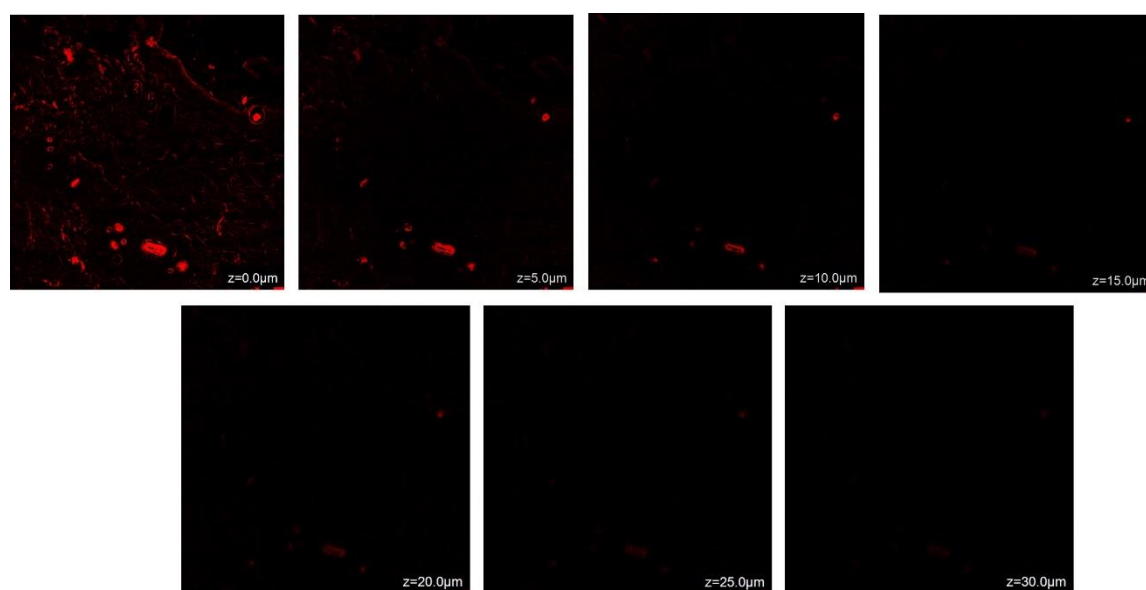

**B. Rhodamine Hydro-ethanolic solution**

**Figure S2.** Confocal images of rats with skin surfaces that have been treated with (A) Rhodamine B-loaded optimized transfersomes gel formulation and (B) Rhodamine B hydroalcoholic solution.
